# Supplementary material for: Absolute Antioxidant Activity of Five Phenol-Rich Essential Oils
Source: MDPI journal article supplement (doi:10.3390/molecules26175237), 2021-08-29
Supplement: s1 [file s1]

# Absolute antioxidant activity of five phenols-rich essential oils

Yafang Guo <sup>1</sup>, Romeo Pizzol <sup>1</sup>, Simone Gabbanini <sup>2</sup>, Andrea Baschieri <sup>3</sup>, Riccardo Amorati <sup>1</sup> and Luca Valgimigli <sup>1,\*</sup>

<sup>1</sup> University of Bologna, Department of Chemistry “G. Ciamician”, Via S. Giacomo 11 - 40126 Bologna, Italy.

<sup>2</sup> BeC s.r.l. - Research & Development, Via C. Monteverdi 49 – 47122 Forlì, Italy. laboratorio@bec-natura.com.

<sup>3</sup> ISOF – CNR, Consiglio Nazionale delle Ricerche, Via P. Gobetti 101 - 40129 Bologna, Italy.

\* Correspondence: luca.valgimigli@unibo.it; Tel.: +39 051 2095683.

## SUPPLEMENTARY MATERIAL

### Table of contents

|                                                                                                                                                                |       |
|----------------------------------------------------------------------------------------------------------------------------------------------------------------|-------|
| <b>Table S1.</b> Result of GC-MS analysis of <i>Thymus vulgaris</i> , L. (red thyme) essential oil on ZB-5 column.                                             | p. 2  |
| <b>Figure S1.</b> TIC chromatogram of <i>Thymus vulgaris</i> , L. (red thyme) essential oil obtained by GC-MS                                                  | p. 3  |
| <b>Table S2.</b> Result of GC-MS analysis of <i>Origanum vulgare</i> , L. (oregano) essential oil on ZB-5 column                                               | p. 4  |
| <b>Figure S2.</b> TIC chromatogram of <i>Origanum vulgare</i> , L. (oregano) essential oil obtained by GC-MS                                                   | p. 5  |
| <b>Table S3.</b> Result of GC-MS analysis of <i>Satureja hortensis</i> , L. (savory) essential oil on ZB-5 column                                              | p. 6  |
| <b>Figure S3.</b> TIC chromatogram of <i>Satureja hortensis</i> , L. (savory) essential oil obtained by GC-MS                                                  | p. 7  |
| <b>Table S4.</b> Result of GC-MS analysis of <i>Eugenia caryophyllus</i> , Spreng (or <i>Syzygium aromaticum</i> , L, clove bud.) essential oil on ZB-5 column | p. 8  |
| <b>Figure S4.</b> TIC chromatogram of <i>Eugenia caryophyllus</i> , Spreng (or <i>Syzygium aromaticum</i> , L, clove bud.) essential oil obtained by GC-MS     | p. 8  |
| <b>Table S5.</b> Result of GC-MS analysis of <i>Cinnamomum zeylanicum</i> , Blume (cinnamon) essential oil on ZB-5 column                                      | p. 9  |
| <b>Figure S5.</b> TIC chromatogram of <i>Cinnamomum zeylanicum</i> , Blume (cinnamon) essential oil obtained by GC-MS                                          | p. 10 |
| <b>Figure S6.</b> Example of one set or raw kinetic oxygen uptake plots for the inhibition of squalene autoxidation by oregano EO.                             | p. 11 |

**Table S1.** Result of GC-MS analysis of *Thymus vulgaris* L. (red thyme) essential oil on ZB-5 column (30m×0.25mm×0.25µm) from 50 to 220°C at 2°C/min. Identification of peaks is obtained with Kovat's Index and fit to NIST14 library (retro-Fit % accuracy is shown in the table).

| Peak # | rt [min] | Nist / Kovat's ID | Area % | NIST'14 r-Fit % | Kovat's Index found | Kovat's Index tabulated | $\Delta$ Kovats |
|--------|----------|-------------------|--------|-----------------|---------------------|-------------------------|-----------------|
| 1      | 5,07     | $\alpha$ -Thujene | 7,01   | 92,1            | 922                 | 931                     | 9               |
| 2      | 5,41     | $\alpha$ -Pinene  | 4,02   | 95,8            | 934                 | 937                     | 3               |
| 3      | 5,92     | Camphene          | 8,40   | 97,1            | 950                 | 952                     | 2               |
| 4      | 6,89     | $\beta$ -Pinene   | 2,61   | 95,7            | 976                 | 979                     | 3               |
| 5      | 8,87     | p-Cymene          | 42,03  | 99,0            | 1024                | 1025                    | 1               |
| 6      | 24,38    | Thymol            | 3,83   | 96,1            | 1289                | 1291                    | 2               |
| 7      | 24,82    | Carvacrol         | 32,10  | 95,2            | 1295                | 1296                    | 1               |

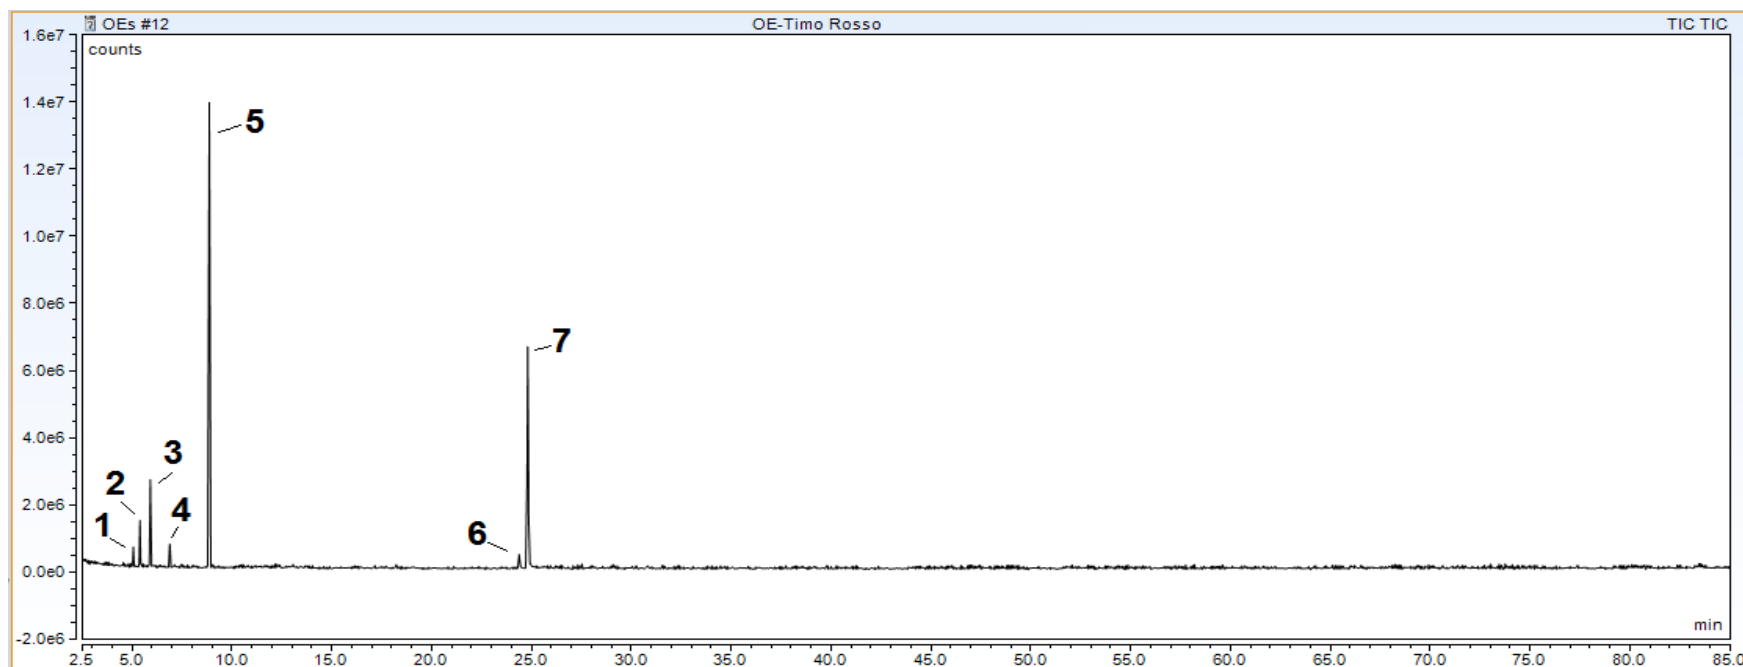

**Figure S1.** TIC chromatogram of *Thymus vulgaris*, L. (red thyme) essential oil obtained by GC-MS on ZB-5 column (30m×0.25mm×0.25μm) from 50 to 220°C at 2°C/min. Peak number correspond to Table S1.

**Table S2.** Result of GC-MS analysis of *Origanum vulgare*, L. (oregano) essential oil on ZB-5 column (30m×0.25mm×0.25µm) from 50 to 220°C at 2°C/min. Identification of peaks is obtained with Kovat's Index and fit to NIST14 library (retro-Fit % accuracy is shown in the table).

| Peak # | rt [min] | Nist / Kovat's ID | Area % | NIST'14 r-Fit % | Kovat's Index found | Kovat's Index tabulated | Δ Kovats |
|--------|----------|-------------------|--------|-----------------|---------------------|-------------------------|----------|
| 1      | 5,25     | α-Phellandrene    | 0,46   | 95,8            | 929                 | 929                     | 0        |
| 2      | 5,41     | α-Pinene          | 0,76   | 97,9            | 934                 | 937                     | 3        |
| 3      | 7,53     | Myrcene           | 1,30   | 97,9            | 991                 | 991                     | 0        |
| 4      | 8,61     | α-Terpinene       | 1,18   | 97,6            | 1017                | 1016                    | -1       |
| 5      | 8,87     | p-Cymene          | 14,50  | 99,5            | 1024                | 1025                    | 1        |
| 6      | 10,54    | γ-Terpinene       | 5,80   | 99,1            | 1059                | 1060                    | 1        |
| 7      | 12,76    | Linalool          | 2,26   | 97,6            | 1098                | 1099                    | 1        |
| 8      | 18,14    | α-Terpineol       | 0,55   | 95,4            | 1190                | 1190                    | 0        |
| 9      | 24,38    | Thymol            | 0,35   | 98,8            | 1289                | 1291                    | 2        |
| 10     | 24,82    | Carvacrol         | 68,21  | 99,0            | 1295                | 1296                    | 1        |
| 11     | 31,65    | β-Caryophyllene   | 1,95   | 98,5            | 1405                | 1406                    | 1        |

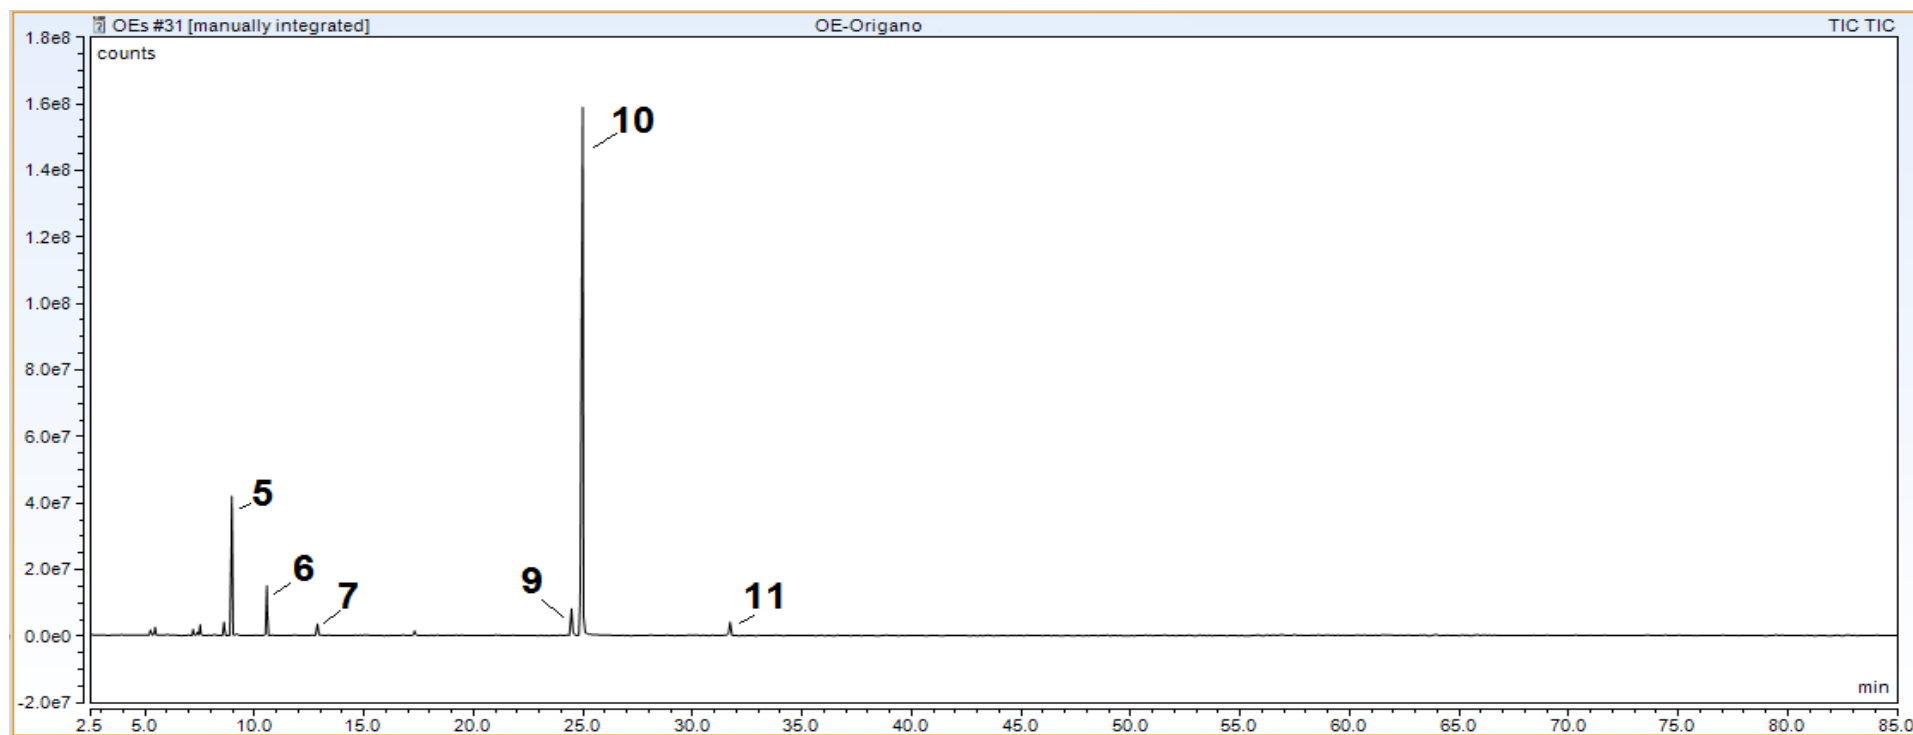

**Figure S2.** TIC chromatogram of *Origanum vulgare*, L. (oregano) essential oil obtained by GC-MS on ZB-5 column (30m×0.25mm×0.25µm) from 50 to 220°C at 2°C/min. Peak number correspond to Table S2.

**Table S3.** Result of GC-MS analysis of *Satureja hortensis*, L. (savory) essential oil on ZB-5 column (30m×0.25mm×0.25µm) from 50 to 220°C at 2°C/min. Identification of peaks is obtained with Kovat's Index and fit to NIST14 library (retro-Fit % accuracy is shown in the table).

| Peak # | rt [min] | Nist / Kovat's ID   | Area % | NIST'14 | r-Fit % | Kovat's Index found | Kovat's Index tabulated | Δ Kovats |
|--------|----------|---------------------|--------|---------|---------|---------------------|-------------------------|----------|
| 1      | 5,41     | α-Pinene            | 2,20   | 99      |         | 934                 | 937                     | 3        |
| 2      | 5,92     | Camphene            | 0,91   | 91,2    |         | 950                 | 952                     | 2        |
| 3      | 6,89     | β-Pinene            | 0,20   | 97,6    |         | 976                 | 978                     | 2        |
| 4      | 7,53     | Myrcene             | 1,42   | 98,5    |         | 991                 | 991                     | 0        |
| 5      | 8,61     | α-Terpinene         | 2,43   | 98,2    |         | 1017                | 1016                    | -1       |
| 6      | 8,87     | p-Cymene            | 19,40  | 99,5    |         | 1024                | 1025                    | 1        |
| 7      | 9,15     | Limonene            | 1,11   | 94,5    |         | 1030                | 1030                    | 0        |
| 8      | 9,19     | Eucalyptol          | 0,80   | 93,1    |         | 1031                | 1032                    | 1        |
| 9      | 10,54    | γ-Terpinene         | 17,91  | 98,8    |         | 1059                | 1060                    | 1        |
| 10     | 24,38    | Thymol              | 1,42   | 98,6    |         | 1289                | 1291                    | 2        |
| 11     | 24,82    | Carvacrol           | 45,80  | 98,7    |         | 1295                | 1296                    | 1        |
| 12     | 27,69    | Thymol Acetate      | 0,82   | 97,9    |         | 1343                | 1338                    | -5       |
| 13     | 31,65    | β-Caryophyllene     | 1,73   | 95,4    |         | 1405                | 1406                    | 1        |
| 14     | 37,42    | Aromadendrene       | 1,22   | 90,1    |         | 1499                | 1459                    | -40      |
| 15     | 37,87    | δ-Cadinene          | 0,41   | 96,5    |         | 1508                | 1508                    | 0        |
| 16     | 41,23    | Caryophyllene Oxide | 0,60   | 93,3    |         | 1566                | 1574                    | 8        |

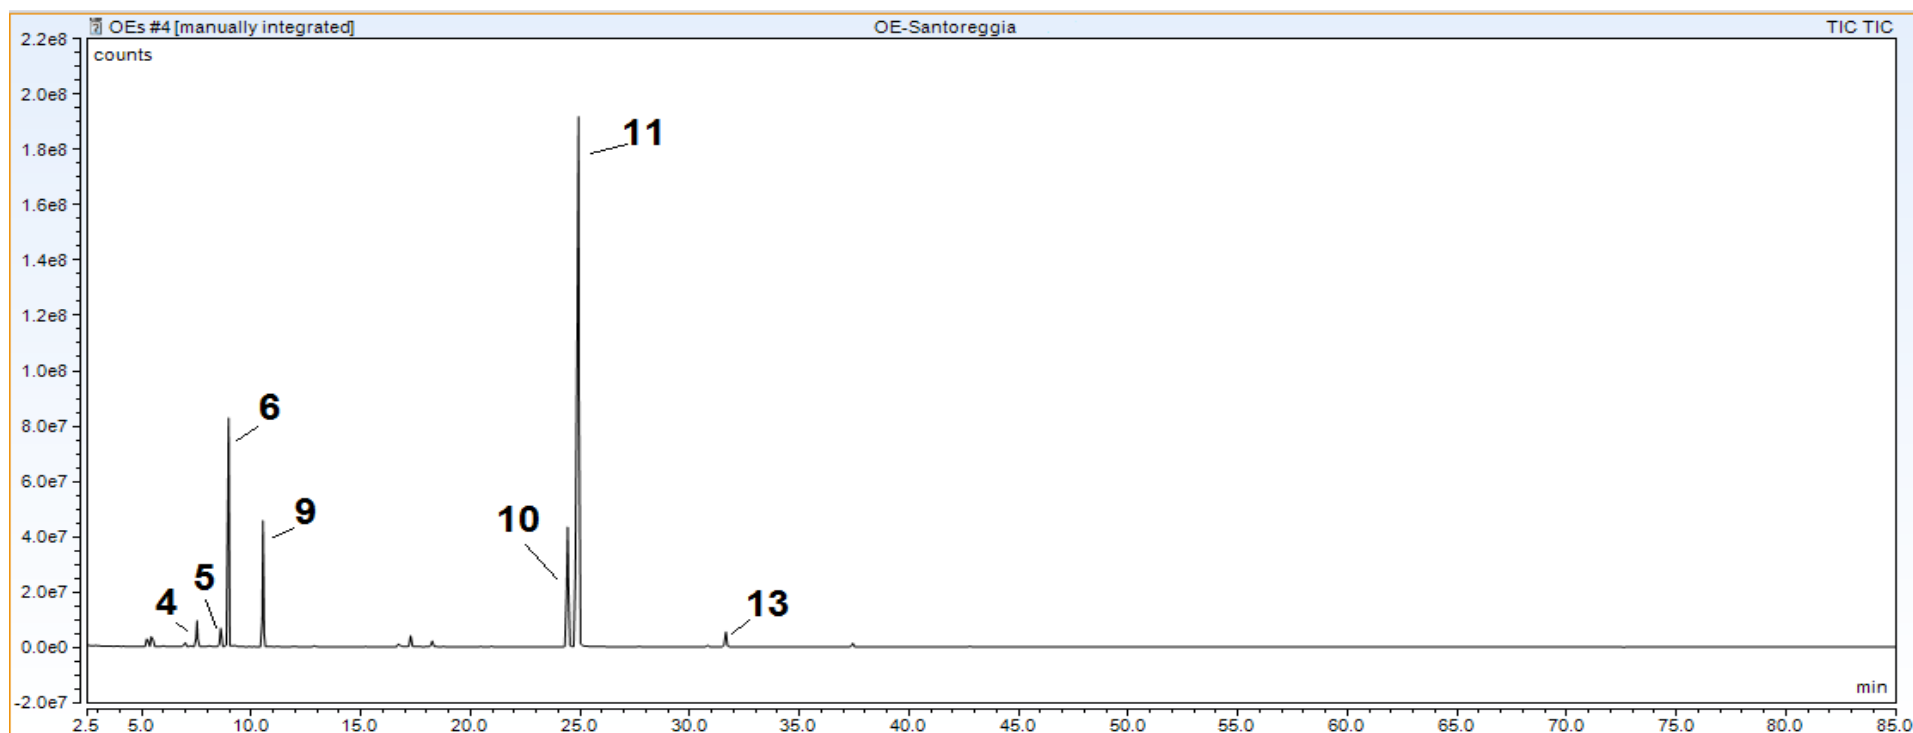

**Figure S3.** TIC chromatogram of *Satureja hortensis*, L. (savory) essential oil obtained by GC-MS on ZB-5 column (30m×0.25mm×0.25μm) from 50 to 220°C at 2°C/min. Peak number correspond to Table S3.

**Table S4.** Result of GC-MS analysis of *Eugenia caryophyllus*, Spreng (or *Syzygium aromaticum*, L, clove bud.) essential oil on ZB-5 column (30m×0.25mm×0.25µm) from 50 to 220°C at 2°C/min. Identification of peaks is obtained with Kovat's Index and fit to NIST14 library (retro-Fit % accuracy is shown in the table).

| Peak # | rt [min] | Nist / Kovat's ID | Area % | NIST'14 r-Fit % | Kovat's Index found | Kovat's Index tabulated | Δ Kovats |
|--------|----------|-------------------|--------|-----------------|---------------------|-------------------------|----------|
| 1      | 27,96    | Eugenol           | 80,41  | 95,8            | 1348                | 1348                    | 0        |
| 2      | 31,72    | β-Caryophyllene   | 8,60   | 96,4            | 1406                | 1404                    | -2       |
| 3      | 33,85    | Humulene          | 0,82   | 94,4            | 1443                | 1454                    | 11       |
| 4      | 38,08    | Eugenyl Acetate   | 10,10  | 98,6            | 1511                | 1524                    | 13       |

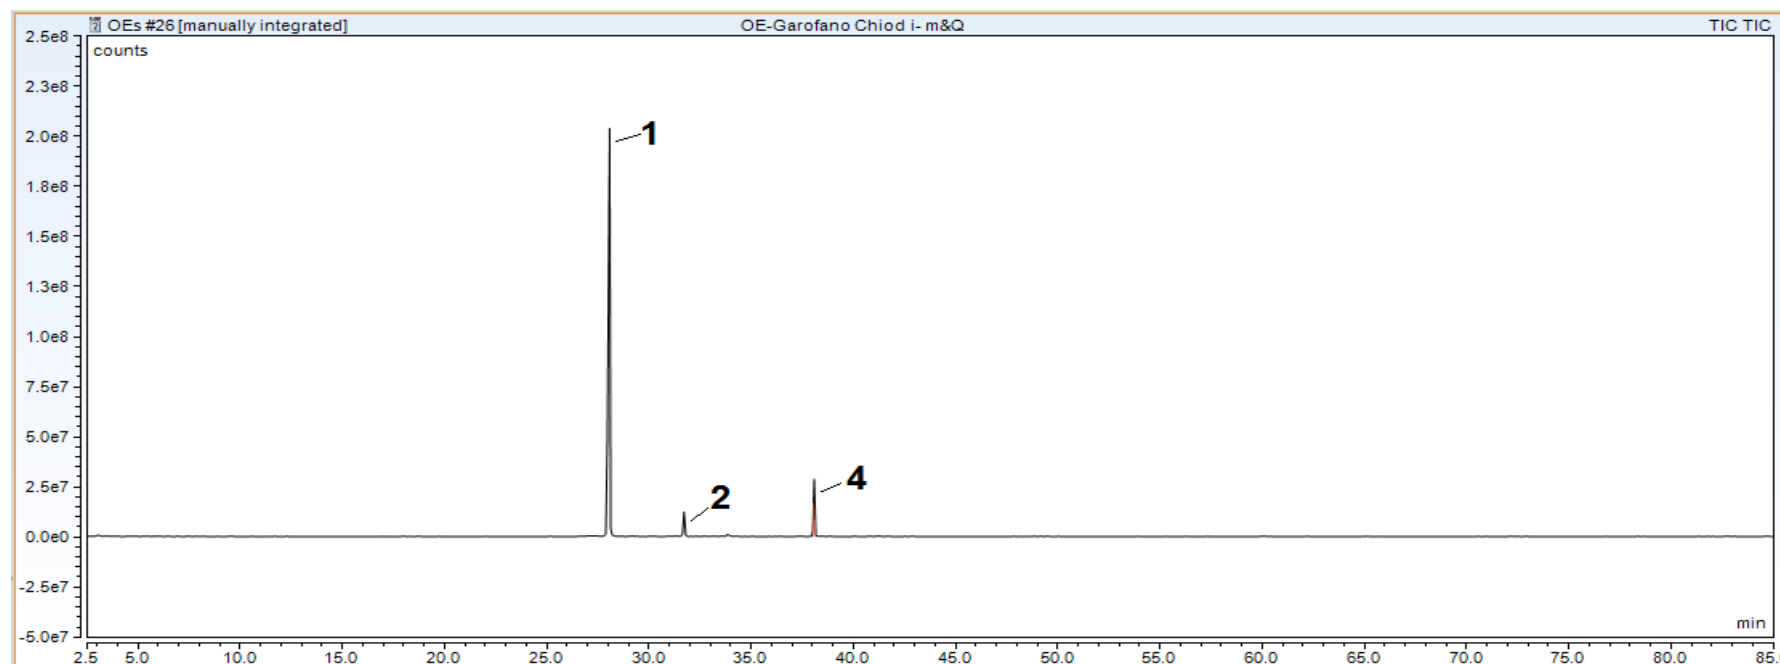

**Figure S4.** TIC chromatogram of *Eugenia caryophyllus*, Spreng (or *Syzygium aromaticum*, L, clove bud.) essential oil obtained by GC-MS on ZB-5 column (30m×0.25mm×0.25µm) from 50 to 220°C at 2°C/min. Peak number correspond to Table S4.



**Table S5.** Result of GC-MS analysis of *Cinnamomum zeylanicum*, Blume (cinnamon) essential oil on ZB-5 column (30m×0.25mm×0.25µm) from 50 to 220°C at 2°C/min. Identification of peaks is obtained with Kovat's Index and fit to NIST14 library (retro-Fit % accuracy is shown in the table).

| Peak # | rt [min] | Nist / Kovat's ID   | Area % | NIST'14 r-Fit % | Kovat's Index found | Kovat's Index tabulated | Δ Kovats |
|--------|----------|---------------------|--------|-----------------|---------------------|-------------------------|----------|
| 1      | 5,41     | α-Pinene            | 2,80   | 98,6            | 934                 | 937                     | 3        |
| 2      | 5,92     | Camphene            | 0,91   | 96,7            | 950                 | 952                     | 2        |
| 3      | 6,89     | β-Pinene            | 0,50   | 94,6            | 976                 | 978                     | 2        |
| 4      | 8,14     | α-Phellandrene      | 1,41   | 95,8            | 1006                | 1005                    | -1       |
| 5      | 8,87     | p-Cymene            | 1,80   | 98,2            | 1024                | 1025                    | 1        |
| 6      | 12,76    | Linalool            | 2,62   | 96,1            | 1098                | 1099                    | 1        |
| 7      | 27,96    | Eugenol             | 80,60  | 99,4            | 1348                | 1348                    | 0        |
| 8      | 31,70    | β-Caryophyllene     | 4,41   | 98,1            | 1405                | 1404                    | -1       |
| 9      | 38,08    | Eugenyl Acetate     | 3,13   | 94,2            | 1511                | 1522                    | 11       |
| 10     | 41,23    | Caryophyllene Oxide | 0,30   | 88,1            | 1566                | 1574                    | 8        |
| 11     | 44,88    | Benzyl Benzoate     | 1,51   | 97,9            | 1776                | 1765                    | -11      |

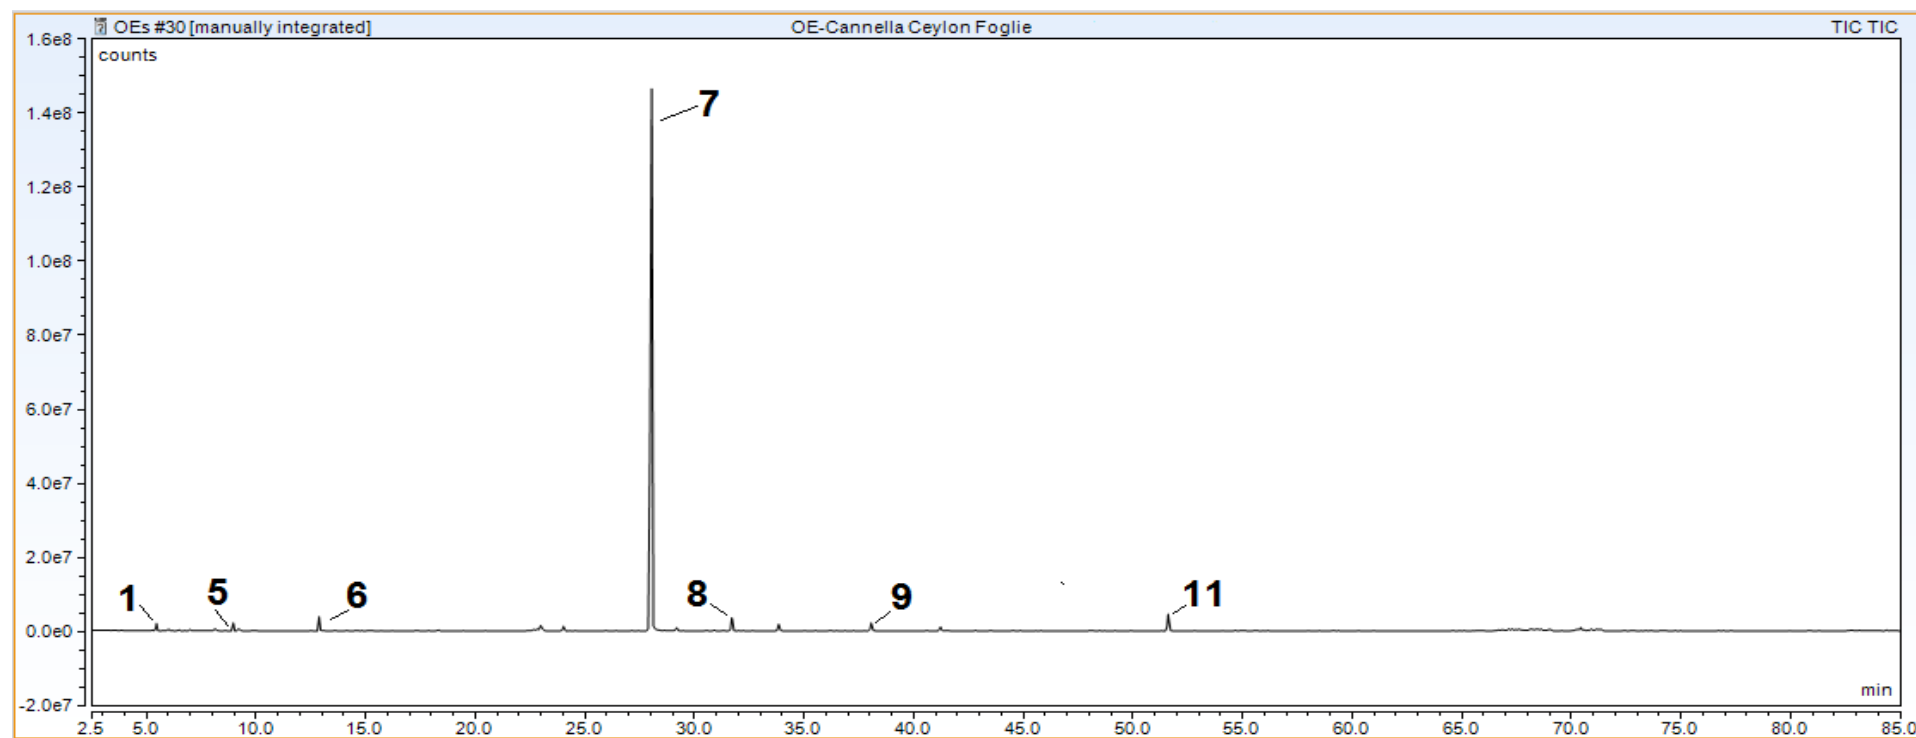

**Figure S5.** TIC chromatogram of *Cinnamomum zeylanicum*, Blume (cinnamon) essential oil obtained by GC-MS on ZB-5 column (30m×0.25mm×0.25μm) from 50 to 220°C at 2°C/min. Peak number correspond to Table S5.

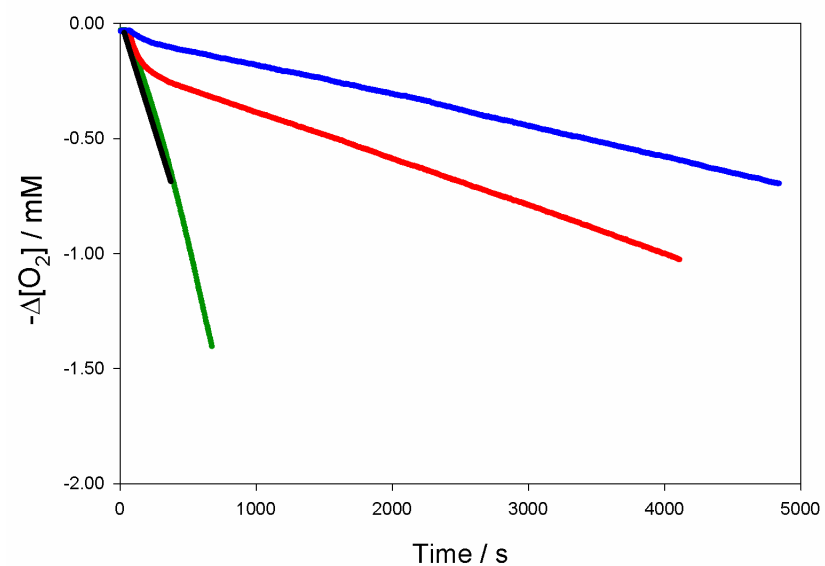

**Figure S6.** Example of one set of raw kinetic oxygen uptake plots for the inhibition of squalene autoxidation by *Origanum vulgare*, L. (oregano) EO. Plots represent the oxygen consumption during the autoxidation of squalene (1.04 M) initiated by AIBN (0.05 M) in PhCl at 30°C without inhibitors (black) or in the presence of oregano EO at different concentrations: 1 mg/L (green), 50 mg/L (red), or 100 mg/L (blue).
